# Supplementary material for: Effect of Topical Antibiotics on Duration of Acute Infective Conjunctivitis in Children: A Randomized Clinical Trial and a Systematic Review and Meta-analysis
Source: PubMed Central journal article supplement (PMC9533187; doi:10.1001/jamanetworkopen.2022.34459), 2022-10-04

## Supplemental Online Content

Honkila M, Koskela U, Kontiokari T, et al. Effect of topical antibiotics on duration of acute infective conjunctivitis in children: a randomized clinical trial and a systematic review and meta-analysis. *JAMA Netw Open*. 2022;5(10):e2234459. doi:10.1001/jamanetworkopen.2022.34459

**eTable 1.** Baseline Characteristics of Participants in the Randomized Clinical Trial

**eTable 2.** Microbiological Findings at Entry

**eTable 3.** Descriptions of the Randomized Clinical Trials Included in the Systematic Review and Meta-analysis

**eTable 4.** Risk of Bias Assessments in the Meta-analysis Material Using the Cochrane Collaboration's Tool for Assessing the Risk of Bias in Randomized Trials

**eFigure 1.** Funnel Plot of Studies Included for Assessment of the Proportion of Participants With Conjunctival Symptoms on Days 3 to 6

**eFigure 2.** Funnel Plot of Studies Included for Assessment of the Proportion of Participants With Conjunctival Symptoms on Days 7 to 10

**eFigure 3.** Funnel Plot of Studies Included for Assessment of the Proportion of Participants Who Had a Positive Bacterial Culture From the Conjunctivae on Days 7 to 10

**eFigure 4.** Proportions of Participants With Conjunctival Symptoms on Days 7 to 10 in Trials Comparing Antibiotics With a Placebo for Treating Acute Conjunctivitis in Children

**eFigure 5.** Proportions of Participants Who Had a Positive Bacterial Culture From the Conjunctivae on Days 7 to 10 in Trials Comparing Antibiotics With a Placebo for Treating Acute Conjunctivitis in Children

This supplemental material has been provided by the authors to give readers additional information about their work.

**eTable 1.** Baseline Characteristics of Participants in the Randomized Clinical Trial

|                                            | <b>Moxiloxacin</b><br><b>n = 30</b> | <b>Placebo</b><br><b>n = 27</b> | <b>No intervention</b><br><b>n = 31</b> |
|--------------------------------------------|-------------------------------------|---------------------------------|-----------------------------------------|
| Age, mean (SD), years                      | 2.8 (1.6)                           | 3.0 (1.3)                       | 3.2 (1.8)                               |
| Sex, n (%)                                 |                                     |                                 |                                         |
| Girls                                      | 17 (57)                             | 13 (48)                         | 16 (52)                                 |
| Boys                                       | 13 (43)                             | 14 (52)                         | 15 (48)                                 |
| Mother's education, n                      | <b>n = 29</b>                       | <b>n = 26</b>                   | <b>n = 31</b>                           |
| Basic education                            | 0                                   | 1                               | 1                                       |
| Vocational education                       | 4                                   | 7                               | 6                                       |
| General upper secondary education          | 0                                   | 0                               | 1                                       |
| Higher education                           | 25                                  | 18                              | 23                                      |
| Father's education, n                      | <b>n = 28</b>                       | <b>n = 24</b>                   | <b>n = 31</b>                           |
| Basic education                            | 2                                   | 0                               | 0                                       |
| Vocational education                       | 6                                   | 10                              | 14                                      |
| General upper secondary education          | 0                                   | 1                               | 0                                       |
| Higher education                           | 20                                  | 13                              | 17                                      |
| No. of siblings, mean (SD)                 | 0.97 (1.09)                         | 1.04 (0.96)                     | 0.71 (0.59)                             |
| <b>Underlying medical condition, n (%)</b> |                                     |                                 |                                         |
| Asthma                                     | 0 (0)                               | 1 (3.7)                         | 1 (3.2)                                 |
| Atopic eczema                              | 1 (3.3)                             | 0 (0)                           | 1 (3.2)                                 |
| Suspected tear duct problem                | 0 (0)                               | 0 (0)                           | 2 (6.5)                                 |
| Food allergy                               | 1 (3.3)                             | 1 (3.7)                         | 0 (0)                                   |
| Allergic rhinitis                          | 1 (3.3)                             | 0 (0)                           | 0 (0)                                   |
| Previous conjunctivitis, n (%)             | 13 (43)                             | 16 (59)                         | 19 (61)                                 |
| Conjunctival erythema                      | 29 (97)                             | 24 (89)                         | 30 (97)                                 |
| Conjunctival discharge                     | 25 (83)                             | 20 (74)                         | 26 (84)                                 |
| Swelling of the eyelids                    | 11 (37)                             | 7 (26)                          | 16 (52)                                 |
| Bilateral conjunctivitis                   | 25 (83)                             | 20 (74)                         | 24 (77)                                 |
| Respiratory tract infection                | 1 (3.3)                             | 5 (19)                          | 4 (13)                                  |
| Otitis media <sup>a</sup>                  | 10 (33)                             | 9 (33)                          | 5 (16)                                  |

|                                              | <b>Moxiloxacin<br/>n = 30</b> | <b>Placebo<br/>n = 27</b> | <b>No intervention<br/>n = 31</b> |
|----------------------------------------------|-------------------------------|---------------------------|-----------------------------------|
| <b>Symptoms reported by guardians, n (%)</b> |                               |                           |                                   |
| Conjunctival erythema                        | 25 (83)                       | 24 (89)                   | 29 (94)                           |
| Conjunctival discharge                       | 27 (90)                       | 23 (85)                   | 27 (87)                           |
| Swelling of the eyelids                      | 12 (40)                       | 10 (37)                   | 18 (58)                           |
| Soreness                                     | 17 (57)                       | 16 (59)                   | 16 (52)                           |
| <b>Other symptoms, n (%)</b>                 |                               |                           |                                   |
| Rhinorrhea                                   | 24 (80)                       | 19 (70)                   | 22 (71)                           |
| Cough                                        | 18 (60)                       | 19 (70)                   | 18 (58)                           |
| Earache                                      | 5 (17)                        | 6 (22)                    | 4 (13)                            |
| Fever > 38                                   | 2 (6.7)                       | 3 (11)                    | 7 (23)                            |
| Irritability                                 | 0 (0)                         | 2 (7.4)                   | 0 (0)                             |
| Headache                                     | 1 (3.3)                       | 0 (0)                     | 0 (0)                             |
| Sore throat                                  | 0 (0)                         | 0 (0)                     | 1 (3.2)                           |
| Stuffy nose                                  | 0 (0)                         | 0 (0)                     | 1 (3.2)                           |
| Vomiting and diarrhea                        | 0 (0)                         | 0 (0)                     | 1 (3.2)                           |

---

<sup>a</sup>All were treated with systemic antibiotics (most with amoxicillin: 9/10 in the moxifloxacin group, 9/10 in the placebo group, and 3/5 in the no intervention group).

---

**eTable 2.** Microbiological Findings at Entry

|                                          | Moxifloxacin <sup>a</sup> | Placebo <sup>b</sup> | No intervention <sup>c</sup> | Total         |
|------------------------------------------|---------------------------|----------------------|------------------------------|---------------|
| <b>Viruses</b>                           |                           |                      |                              |               |
| <i>Nasopharyngeal sample available</i>   | <b>n = 28</b>             | <b>n = 25</b>        | <b>n = 31</b>                | <b>N = 84</b> |
| At least one virus detected, n (%)       | 16 (57)                   | 17 (68)              | 13 (42)                      | 46 (55)       |
| Rhinovirus                               | 9 (32)                    | 7 (28)               | 6 (19)                       | 22 (26)       |
| Bocavirus                                | 6 (21)                    | 2 (8.0)              | 1 (3.2)                      | 9 (11)        |
| Adenovirus                               | 1 (3.6)                   | 3 (12)               | 4 (13)                       | 8 (9.5)       |
| Coronavirus HKU1/NL63/OC43               | 3 (11)                    | 3 (12)               | 0 (0)                        | 6 (7.1)       |
| Parainfluenzavirus types 3, 4            | 0 (0)                     | 1 (4.0)              | 3 (9.7)                      | 4 (4.7)       |
| Enterovirus                              | 0 (0)                     | 1 (4.0)              | 1 (3.2)                      | 2 (2.4)       |
| Rhinovirus/enterovirus                   | 0 (0)                     | 2 (8.0)              | 0 (0)                        | 2 (2.4)       |
| Human metapneumovirus                    | 0 (0)                     | 1 (4.0)              | 0 (0)                        | 1 (1.2)       |
| RSV                                      | 0 (0)                     | 1 (4.0)              | 0 (0)                        | 1 (1.2)       |
| <br><i>Conjunctival sample available</i> | <b>n = 28</b>             | <b>n = 25</b>        | <b>n = 31</b>                | <b>N = 84</b> |
| At least one virus detected, n (%)       | 5 (18)                    | 3 (12)               | 2 (6.5)                      | 10 (12)       |
| Bocavirus                                | 3 (11)                    | 1 (4.0)              | 0 (0)                        | 4 (4.8)       |
| Rhinovirus/enterovirus                   | 2 (7.1)                   | 0 (0)                | 2 (6.5)                      | 4 (4.8)       |
| Coronavirus HKU1/OC43                    | 1 (3.6)                   | 1 (4.0)              | 0 (0)                        | 2 (2.4)       |
| Adenovirus                               | 0 (0)                     | 1 (4.0)              | 0 (0)                        | 1 (1.2)       |
| Human metapneumovirus                    | 1 (3.6)                   | 0 (0)                | 0 (0)                        | 1 (1.2)       |
| <b>Bacteria</b>                          |                           |                      |                              |               |
| <i>Conjunctival sample available</i>     | <b>n = 29</b>             | <b>n = 25</b>        | <b>n = 30</b>                | <b>N = 84</b> |
| At least one pathogen detected, n (%)    | 27 (93)                   | 19 (76)              | 24 (80)                      | 70 (83)       |
| <i>Haemophilus influenzae</i>            | 24 (83)                   | 15 (60)              | 19 (63)                      | 58 (69)       |
| <i>Streptococcus pneumoniae</i>          | 4 (14)                    | 2 (8.0)              | 4 (13)                       | 10 (12)       |
| <i>Staphylococcus aureus</i>             | 0 (0)                     | 5 (20)               | 3 (10)                       | 8 (9.5)       |
| <i>Moraxella catarrhalis</i>             | 0 (0)                     | 1 (4.0)              | 1 (3.3)                      | 2 (2.4)       |
| Group A streptococcus                    | 0 (0)                     | 0 (0)                | 1 (3.3)                      | 1 (1.2)       |
| Group C streptococcus                    | 0 (0)                     | 1 (4.0)              | 0 (0)                        | 1 (1.2)       |

<sup>a</sup>1 child had 2 bacteria in the conjunctivae, 2 children had 2 viruses in the conjunctivae and 3 children had 2 viruses in the nasopharynx.

<sup>b</sup>5 children had 2 bacteria in the conjunctivae, 3 children had 2 viruses in the nasopharynx and 1 child had 3 viruses in the nasopharynx.

<sup>c</sup>3 children had 2 bacteria in the conjunctivae and 2 children had 2 viruses in the nasopharynx.

**eTable 3.** Descriptions of the Randomized Clinical Trials Included in the Systematic Review and Meta-analysis

| Author, year                                       | Gigliotti et al, <sup>3</sup> 1984 | Rose et al, <sup>4</sup> 2005                                          | Comstock et al, <sup>8</sup> 2010                           | Present study                                                                                                         |
|----------------------------------------------------|------------------------------------|------------------------------------------------------------------------|-------------------------------------------------------------|-----------------------------------------------------------------------------------------------------------------------|
| Antimicrobial agent                                | Polymyxin-bacitracin               | Chloramphenicol 0.5%                                                   | Besifloxacin 0.6%<br>(includes benzalkonium chloride 0.01%) | Moxifloxacin                                                                                                          |
| Placebo                                            | Vehicle without antibiotics        | Distilled water with the excipients boric acid (1.5%) and borax (0.3%) | Vehicle without antibiotics                                 | Artificial tears containing carmellose sodium, sodium chloride, sodium lactate, potassium chloride and purified water |
| No. of patients in antibiotic group                | 34                                 | 163                                                                    | 73                                                          | 30                                                                                                                    |
| No. of patients in placebo group                   | 32                                 | 163                                                                    | 62                                                          | 27                                                                                                                    |
| No. of patients in no treatment group              | NR                                 | NR                                                                     | NR                                                          | 31                                                                                                                    |
| Mean (SD) age of antibiotic group                  | NR                                 | 3.3 (2.8)                                                              | NR (range 1-5 y)                                            | 2.8 (1.6)                                                                                                             |
| Mean (SD) age of placebo group                     | NR                                 | 3.3 (2.6)                                                              | NR (range 1-5 y)                                            | 3.0 (1.3)                                                                                                             |
| Mean (SD) age of no treatment group                | NR                                 | NR                                                                     | NR                                                          | 3.2 (1.8)                                                                                                             |
| Clinically cured on days 3-6 in antibiotic group   | 21/34                              | 64/163                                                                 | 45/73                                                       | 24/30                                                                                                                 |
| Clinically cured on days 3-6 in placebo group      | 9/32                               | 54/163                                                                 | 31/62                                                       | 19/27                                                                                                                 |
| Clinically cured on days 3-6 in no treatment group | NR                                 | NR                                                                     | NR                                                          | 15/31                                                                                                                 |
| Clinically cured on days 7-10 in antibiotic group  | 31/34                              | 140/163                                                                | 64/73                                                       | 28/30                                                                                                                 |
| Clinically cured on days 7-10 in placebo group     | 23/32                              | 128/163                                                                | 47/62                                                       | 26/27                                                                                                                 |

| Author, year                                               | Gigliotti et al, <sup>3</sup> 1984                                               | Rose et al, <sup>4</sup> 2005                                                                              | Comstock et al, <sup>8</sup> 2010 | Present study                                                                                                                                                                                    |
|------------------------------------------------------------|----------------------------------------------------------------------------------|------------------------------------------------------------------------------------------------------------|-----------------------------------|--------------------------------------------------------------------------------------------------------------------------------------------------------------------------------------------------|
| Clinically cured on days 7-10 in no treatment group        | NR                                                                               | NR                                                                                                         | NR                                | 27/31                                                                                                                                                                                            |
| Duration of eye symptoms in antibiotic group               | NR                                                                               | 5.0 (1.9)                                                                                                  | NR                                | 3.8 (3.1)                                                                                                                                                                                        |
| Duration of eye symptoms in placebo group                  | NR                                                                               | 5.4 (1.9)                                                                                                  | NR                                | 4.0 (2.3)                                                                                                                                                                                        |
| Duration of eye symptoms in no treatment group             | NR                                                                               | NR                                                                                                         | NR                                | 5.7 (3.3)                                                                                                                                                                                        |
| Microbiologically cured on days 7-10 in antibiotic group   | 27/34                                                                            | 50/125                                                                                                     | 55/73                             | NR                                                                                                                                                                                               |
| Microbiologically cured on days 7-10 in placebo group      | 10/32                                                                            | 29/125                                                                                                     | 37/62                             | NR                                                                                                                                                                                               |
| Microbiologically cured on days 7-10 in no treatment group | NR                                                                               | NR                                                                                                         | NR                                | NR                                                                                                                                                                                               |
| Bacterial pathogens in the conjunctivae                    | 61 <i>Haemophilus influenzae</i><br>22 <i>Streptococcus pneumoniae</i><br>1 both | 197 <i>Haemophilus influenzae</i><br>64 <i>Streptococcus pneumoniae</i><br>36 <i>Moraxella catarrhalis</i> | NR                                | 58 <i>Haemophilus influenzae</i><br>10 <i>Streptococcus pneumoniae</i><br>8 <i>Staphylococcus aureus</i><br>2 <i>Moraxella catarrhalis</i><br>1 Group A streptococcus<br>1 Group C streptococcus |
| Viral pathogens in the conjunctivae                        |                                                                                  | 19 adenovirus<br>24 picornavirus                                                                           | NR                                | 4 bocavirus<br>3 rhinovirus<br>2 coronavirus (not SARS-CoV-2)<br>1 adenovirus<br>1 enterovirus<br>1 human metapneumovirus                                                                        |

Abbreviations: NR, not reported.

**eTable 4.** Risk of Bias Assessments in the Meta-analysis Material Using the Cochrane Collaboration’s Tool for Assessing the Risk of Bias in Randomized Trials<sup>a</sup>

|                                    | Random sequence generation | Allocation concealment | Blinding of participants and personnel | Blinding of outcome assessment | Incomplete outcome data | Selective reporting | Other bias |
|------------------------------------|----------------------------|------------------------|----------------------------------------|--------------------------------|-------------------------|---------------------|------------|
| Gigliotti et al, <sup>3</sup> 1984 | ?                          | +                      | +                                      | +                              | ?                       | –                   | +          |
| Rose et al, <sup>4</sup> 2005      | +                          | +                      | +                                      | +                              | +                       | +                   | –          |
| Comstock et al, <sup>8</sup> 2010  | +                          | ?                      | ?                                      | –                              | –                       | –                   | –          |
| Present study <sup>b</sup>         | +                          | +                      | +                                      | +                              | +                       | +                   | +          |

Abbreviations: +, low risk of bias; –, high risk of bias; ?, unclear risk of bias.

<sup>a</sup>Higgins JP, Altman DG, Gøtzsche PC, et al; Cochrane Bias Methods Group; Cochrane Statistical Methods Group. The Cochrane Collaboration's tool for assessing risk of bias in randomised trials. *BMJ*. 2011;343:d5928.

<sup>b</sup>Self-assessment.



**eFigure 1.** Funnel Plot of Studies Included for Assessment of the Proportion of Participants With Conjunctival Symptoms on Days 3 to 6

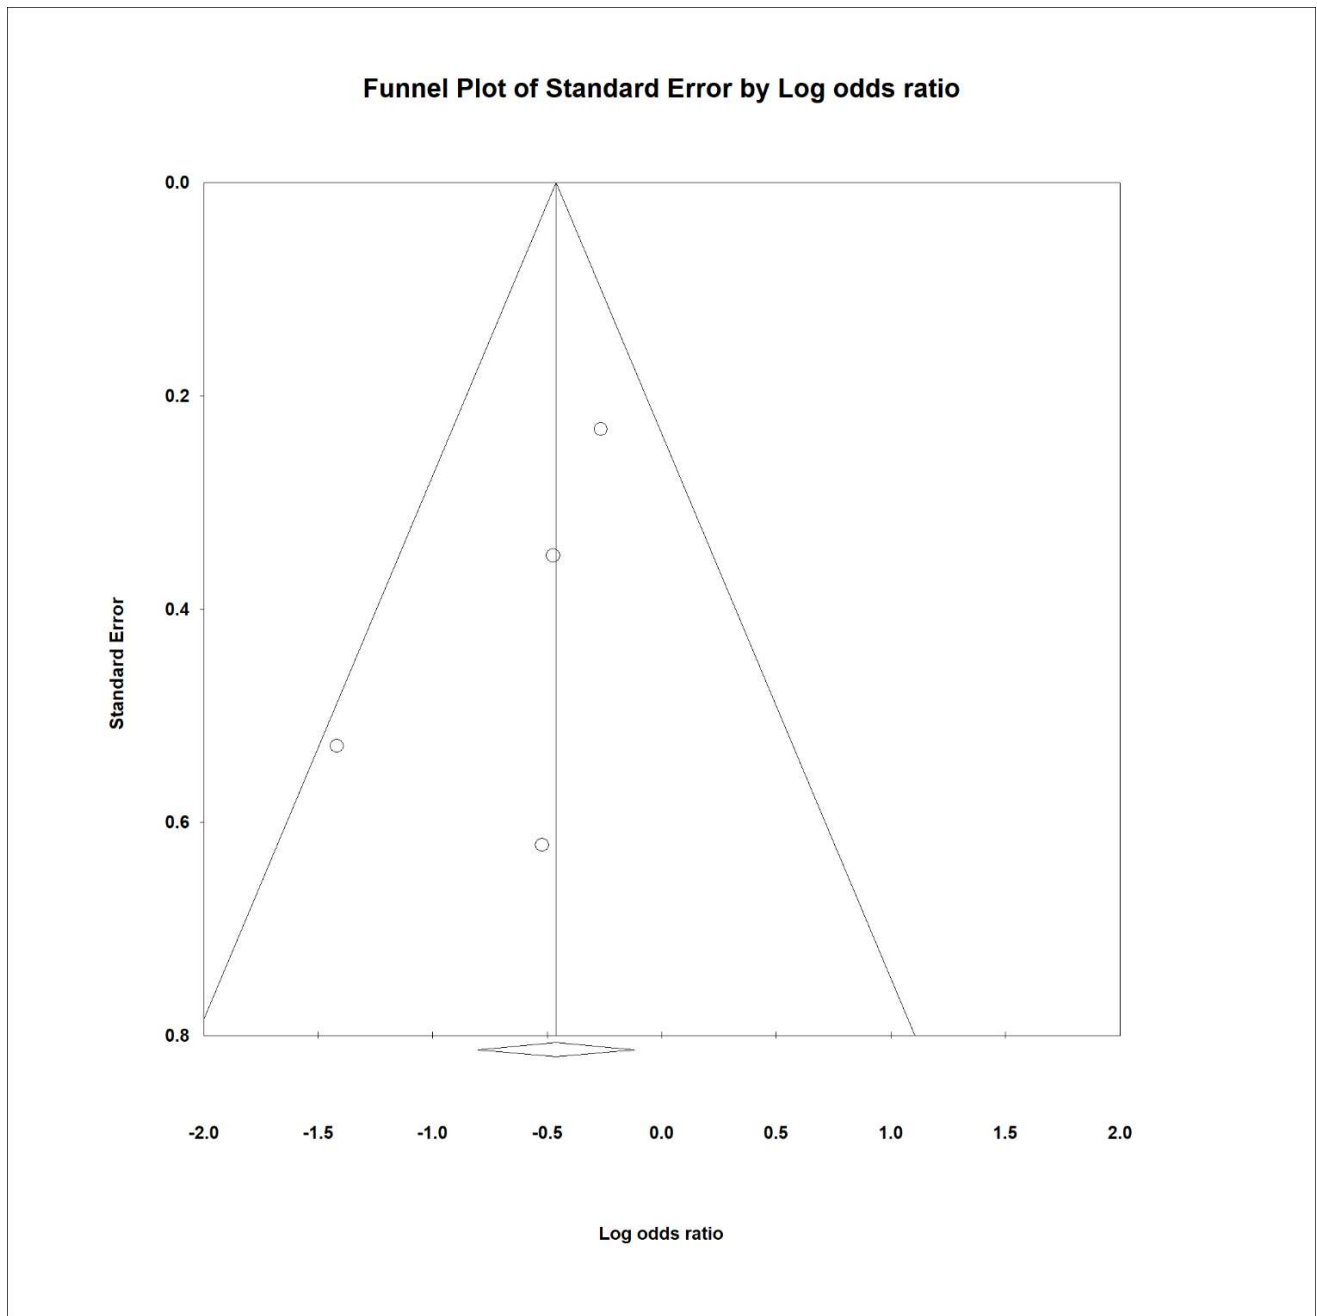

Egger test:  $P = 0.26$

**eFigure 2.** Funnel Plot of Studies Included for Assessment of the Proportion of Participants With Conjunctival Symptoms on Days 7 to 10

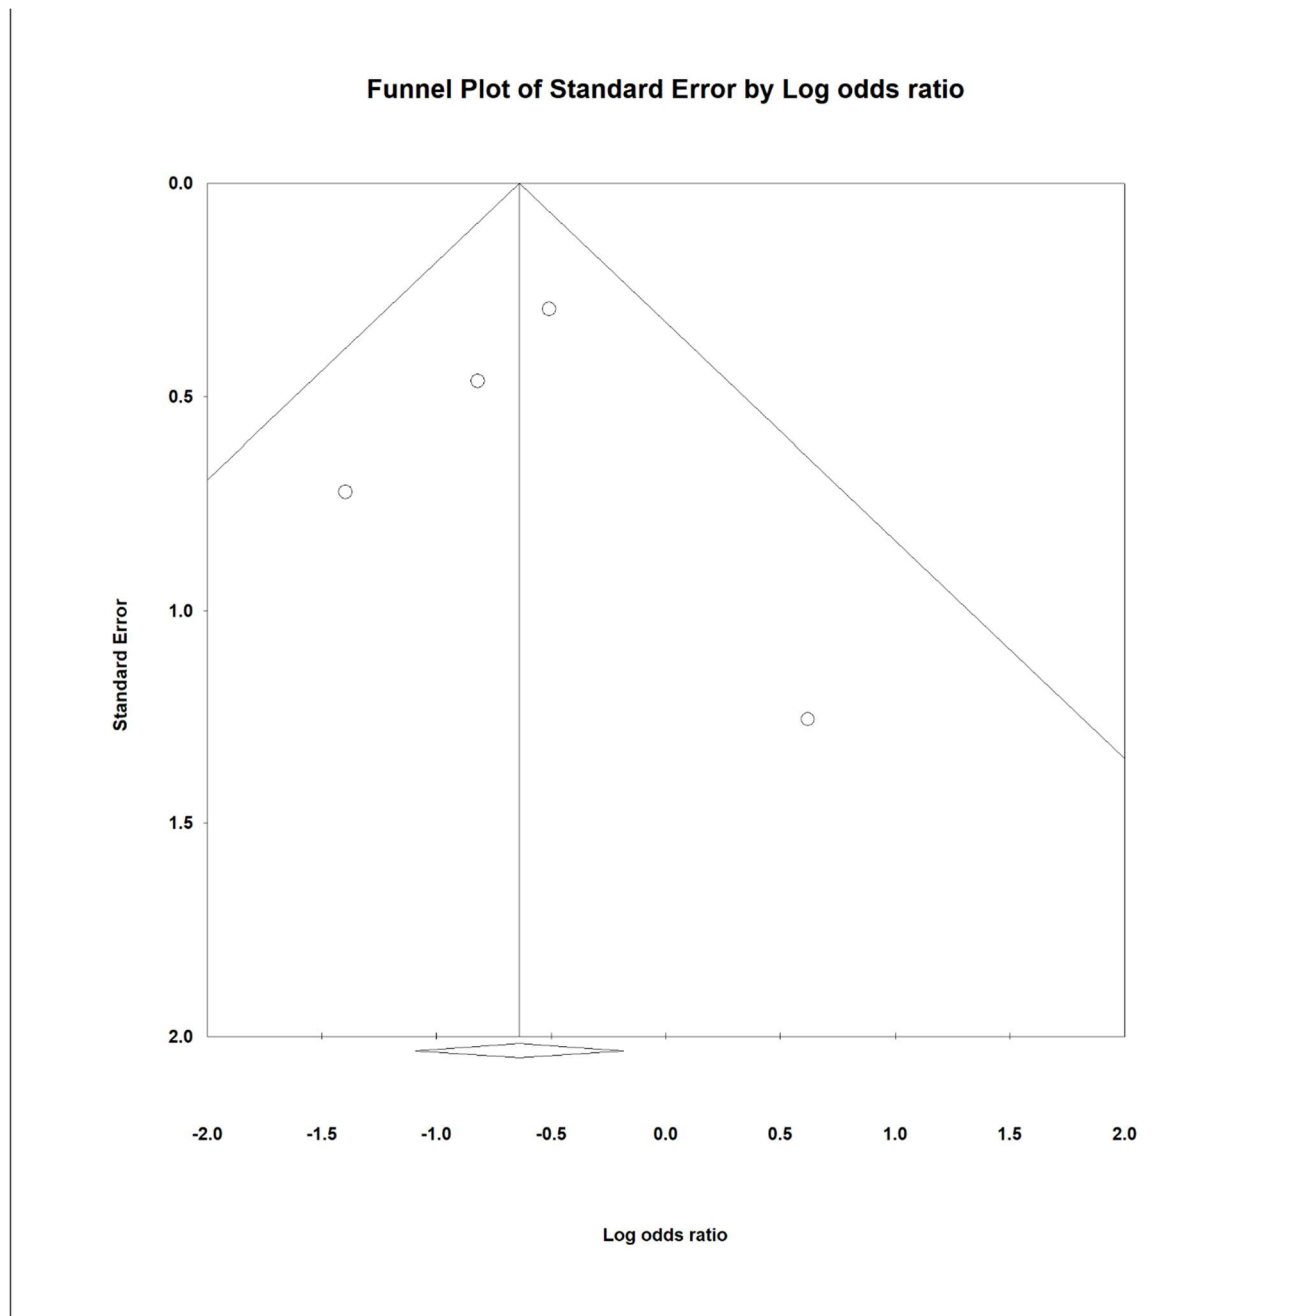

Egger test:  $P = 1.00$

**eFigure 3.** Funnel Plot of Studies Included for Assessment of the Proportion of Participants Who Had a Positive Bacterial Culture From the Conjunctivae on Days 7 to 10

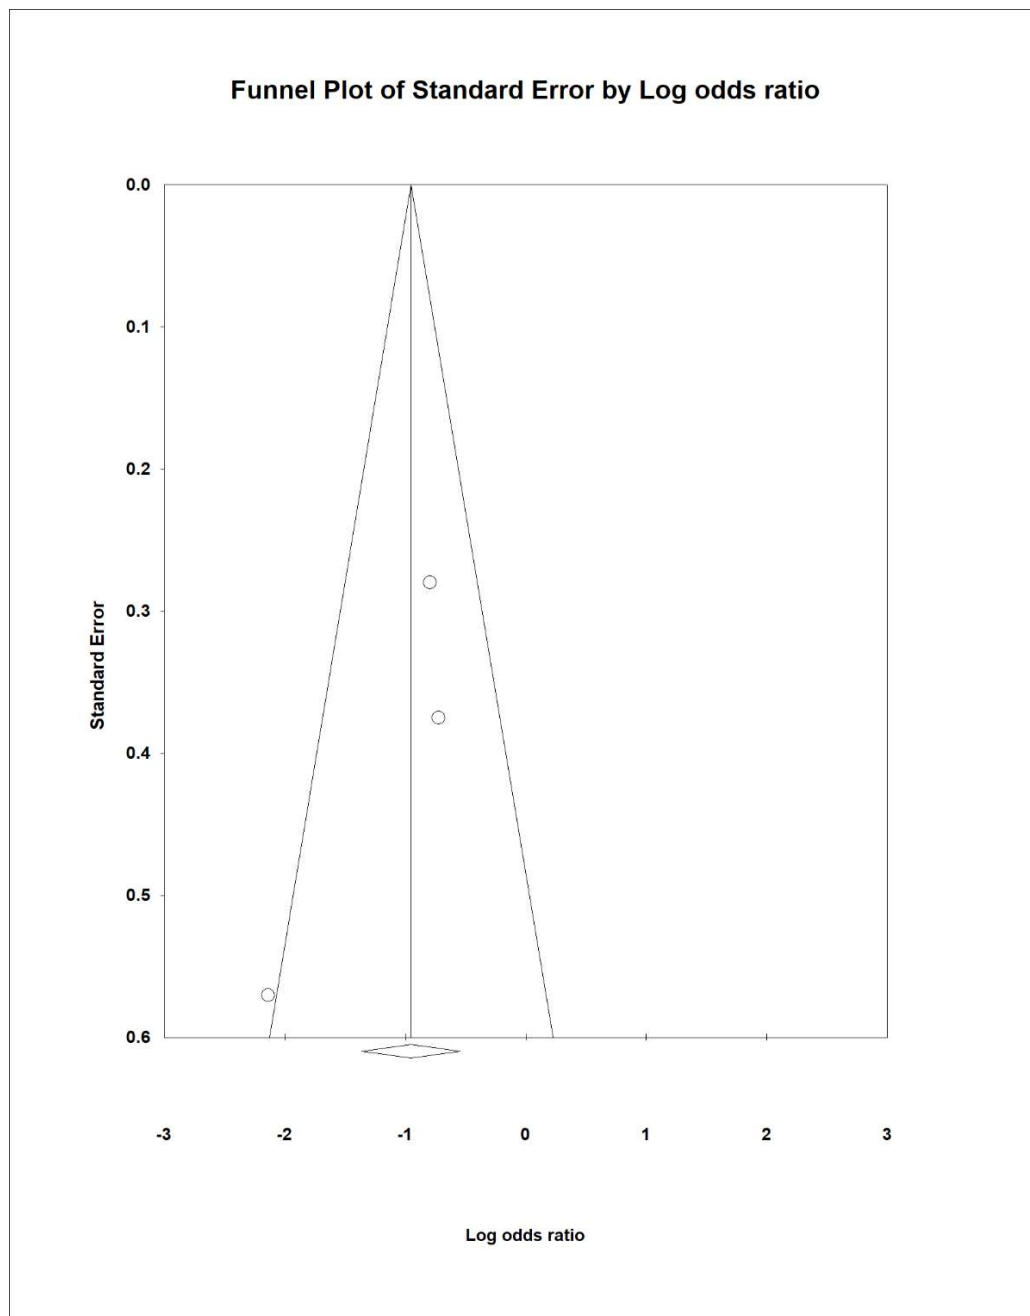

Harbord-Egger test:  $P = 0.39$

**eFigure 4.** Proportions of Participants With Conjunctival Symptoms on Days 7 to 10 in Trials Comparing Antibiotics With a Placebo for Treating Acute Conjunctivitis in Children

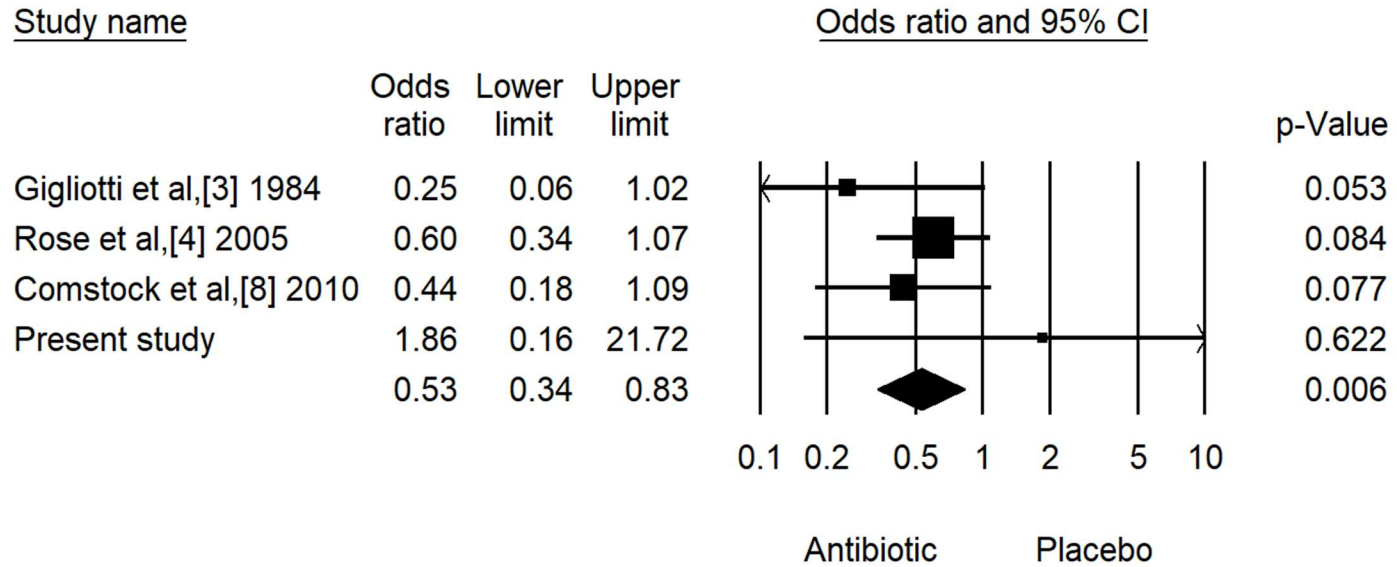

**eFigure 5.** Proportions of Participants Who Had a Positive Bacterial Culture From the Conjunctivae on Days 7 to 10 in Trials Comparing Antibiotics With a Placebo for Treating Acute Conjunctivitis in Children

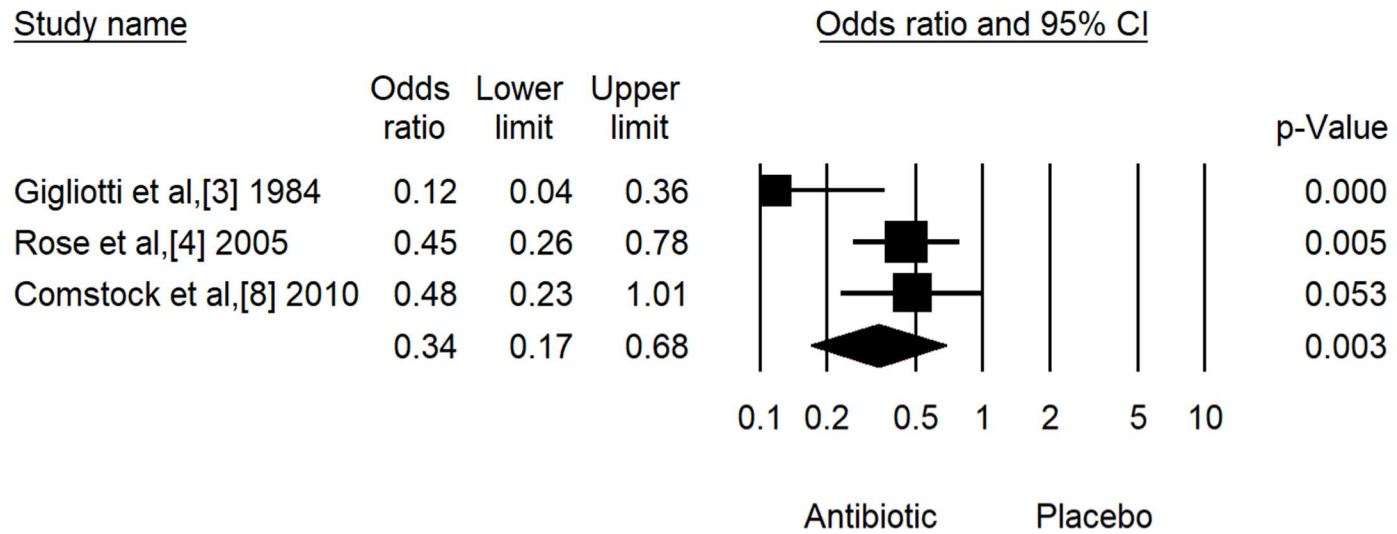

Supplement: jamanetwopen-e2234459-s002.pdf [file jamanetwopen-e2234459-s002.pdf]
