# Supplementary material for: Effect of Topical Antibiotics on Duration of Acute Infective Conjunctivitis in Children: A Randomized Clinical Trial and a Systematic Review and Meta-analysis
Source: PubMed Central journal article supplement (PMC9533187; doi:10.1001/jamanetworkopen.2022.34459), 2022-10-04
Supplement: jamanetwopen-e2234459-s001.pdf [file jamanetwopen-e2234459-s001.pdf]

1 **Topical Antibiotics for Acute Infective Conjunctivitis in Children: A Randomized Clinical Trial**  
2 **and a Systematic Review and Meta-analysis**

3  
4 *Study Protocol and Statistical Analysis Plan*

5  
6 Minna Honkila<sup>1,2</sup>, M.D., Ph.D., Ulla Koskela<sup>1,2</sup>, M.D., Ph.D., Tero Kontiokari<sup>3</sup>, M.D., Ph.D., Marja-  
7 Leena Mattila<sup>3</sup>, M.D., Ph.D., Aila Kristo<sup>3</sup>, M.D., Ph.D., Raija Valtonen<sup>4</sup>, M.D., Suvi Sarlin<sup>1,2</sup>, M.D.,  
8 Tytti Pokka<sup>1,2</sup>, M.Sc., Niko Paalanne<sup>1,2</sup>, M.D., Ph.D., Irma Ikäheimo<sup>5</sup>, Ph.D., Matti Uhari<sup>1,2</sup>, M.D.,  
9 Ph.D., Marjo Renko<sup>6</sup>, M.D., Ph.D., Terhi Tapiainen<sup>1,2,7</sup>, M.D., Ph.D.

- 10  
11 1. Department of Pediatrics and Adolescent Medicine, Oulu University Hospital, Oulu, Finland  
12 2. Research Unit of Clinical Medicine and Medical Research Centre Oulu, University of Oulu,  
13 Oulu, Finland  
14 3. Mehiläinen Oulu, Oulu, Finland  
15 4. Terveystalo Oulu, Oulu, Finland  
16 5. NordLab Oulu, Oulu, Finland  
17 6. University of Eastern Finland and Kuopio University Hospital, Kuopio, Finland  
18 7. Biocenter Oulu, University of Oulu, Oulu, Finland

19  
20 Contact information:

21 Minna Honkila, M.D., Ph.D., pediatric infectious diseases specialist  
22 Department of Pediatrics and Adolescent Medicine  
23 Oulu University Hospital  
24 P.O. Box 23  
25 FIN-90029 Oulu University Hospital, Finland  
26 email: minna.honkila@oulu.fi, telephone: +358-9-3155863

27 **1. INTRODUCTION**

28 **1.1. Background**

29 Acute conjunctivitis is a common childhood infection which is usually viral or bacterial in etiology.

30 According to previous studies, around 80% of cases are caused by bacteria and 13-20% by viruses.<sup>1-2</sup>

31 Bacterial conjunctivitis is commonly due to *Haemophilus influenzae*, *Streptococcus pneumoniae*,  
32 *Moraxella catarrhalis*, or *Staphylococcus aureus*, whereas viral conjunctivitis is usually caused by  
33 adenoviruses.<sup>1-4</sup> It is, however, difficult to differentiate on clinical grounds whether the infection is  
34 viral or bacterial.

35

36 Topical antibiotics are a standard clinical practice for the treatment of acute infective conjunctivitis,<sup>5</sup>  
37 because they seem to speed recovery and reduce relapse.<sup>6</sup> However, the benefits of antibiotic therapy in  
38 the management of childhood conjunctivitis are poorly documented. There are only two previous  
39 randomized controlled trials that have investigated topical antimicrobial therapy in acute infective  
40 conjunctivitis in children. Gigliotti et al. reported in their study comprising 102 children aged 1 month  
41 to 18 years from the late 1970's and early 1980's that treatment with polymyxin-bacitracin resulted in  
42 greater clinical and microbiological remission at days 2 to 5 compared with placebo treatment.<sup>4</sup> On the  
43 other hand, Rose et al. found in their trial consisting of 326 children that there was no difference in the  
44 clinical cure rate by day 7 between children receiving a placebo and those receiving chloramphenicol.<sup>1</sup>

45

46 **1.2. Objectives**

47 The aims of this study are to investigate the efficacy of topical antibiotic therapy compared with either  
48 placebo eye drops or no treatment for the management of acute conjunctivitis in children and to assess  
49 the microbiological etiology of acute conjunctivitis.

50

51 **2. MATERIAL AND METHODS**

52 **2.1. Trial design**

53 The study is a single center randomized controlled trial comparing topical antibiotic therapy with a  
54 topical placebo and with no intervention.

55

56 **2.2. Participants and setting**

57 The trial will include children 6 months to 7 years of age with a clinical diagnosis of acute  
58 conjunctivitis (defined as the presence of conjunctival discharge, erythema, soreness or swelling of the  
59 eyelids). The exclusion criteria are allergy to fluoroquinolones, antibiotic therapy 7 days prior to the  
60 trial, severe infection, allergic conjunctivitis, or a trauma or a foreign body in the eye. The study will be  
61 conducted at 2 pediatric outpatient clinics in the city of Oulu and at the pediatric emergency department  
62 of Oulu University Hospital, Oulu, Finland.

63

64 **2.3. Interventions**

65 The children deemed eligible will be randomly assigned in a 1:1:1 ratio to receive moxifloxacin eye  
66 drops (Vigamox 5 mg/mL; Novartis Finland, Espoo, Finland), placebo eye drops (Celluvisc 1.0%;  
67 Allergan Pharmaceuticals Ireland, Westport, Co. Mayo, Ireland), or no intervention. Both moxifloxacin  
68 and placebo eye drops are to be applied one drop 3 times daily until the symptoms have been absent for  
69 at least 24 hours but no longer than 7 days. All participants will be advised to remove discharge from  
70 the eyes at least 3 times a day and before applying the eye drops.

71

72 **2.4. Blinding**

73 The children participating in the trial, their parents and the physicians and nurses involved will be  
74 blinded to the medications applied but not to the choice of no treatment because of the obvious nature  
75 of the intervention. Moxifloxacin eye drops are packed in 5 mL plastic dropper bottles with a screw top  
76 and the placebo eye drops in 0.4 mL single-dose plastic vials with flip off seals. Both the bottles and  
77 the vials are transparent and do not have any labels on them. The eye drop bottles and vials will then be  
78 packed into opaque cardboard boxes which will also contain instructions for applying the eye drops.

79

## 80 **2.5. Procedures**

81 The children will be recruited by pediatricians working in private health care clinics in Oulu, Finland  
82 (TK, M-LM, AK, RV), and conjunctival and nasopharyngeal specimens will be obtained from them by  
83 the laboratory personnel at those clinics. An instruction sheet about sampling will be prepared and  
84 distributed to the laboratory personnel. In addition, all the materials needed for specimen collection will  
85 be packed in ready-for-use sets. Parents will be asked to complete a questionnaire about their child's  
86 current condition and to continue the follow-up for 14 days using the daily symptom sheet diary. In  
87 addition, the research physician (MH) will send an SMS to parents after 14 days of follow-up to verify  
88 the absence of symptoms. Parents can contact this physician any time during the trial if they are  
89 concerned about the child's condition. Moxifloxacin eye drops will be started in a non-blinded manner  
90 as a rescue treatment if needed.

91

92 Transystem M40 transport cotton tipped swabs will be used for bacterial culture and flocced swabs  
93 (Copan FLOQSwabs; Copan Diagnostics, Inc) for respiratory pathogen polymerase chain reaction  
94 (PCR) testing. Conjunctival specimens will be collected from the actual site of infection, and from both  
95 eyes in cases of bilateral conjunctivitis. The area around the affected eye will be cleansed to remove  
96 discharge, after which the culture material will be obtained by swabbing the mucosal area of the lower

97 eyelid. After that, the inner surface of the lower eyelid is to be swabbed thoroughly two to three times  
98 to collect epithelial cells for nucleic acid amplification testing. Nasopharyngeal swabs will be obtained  
99 from each child by passing the swab through the nostril to the nasopharynx and rotating it at least two  
100 to three times to collect epithelial cells. The swab for respiratory viruses will be inserted into a 3 mL  
101 transport medium tube (Universal Transport Media, UTM™; Copan Diagnostics, Inc). The swabs will  
102 be stored and transported at room temperature to the clinical microbiological laboratory at Oulu  
103 University Hospital (NordLab, Oulu) on the same working day.

104

105 Sheep blood agars at a concentration of 5% and chocolate agars will be used throughout to culture the  
106 bacteria. In addition, mass spectrometry (VITEK, bioMerieux) will be used to identify the bacteria  
107 from 2018 onwards.

108

109 A multiplex real-time PCR will be used to detect respiratory viruses. From 15 October 2014 to 31  
110 December 2019 the panel will include adenovirus, bocavirus, enteroviruses, influenza viruses A and B,  
111 corona viruses 229E, NL63, and OC43, human metapneumovirus, parainfluenza viruses 1, 2, 3 and 4,  
112 respiratory syncytial viruses A and B, and rhinovirus, while from 1 January 2020 onwards it will  
113 include influenza A, influenza A subtypes H1N1, H1 and H3, influenza B, corona viruses 229E,  
114 HKU1, NL63 and OC43, parainfluenza viruses 1, 2, 3 and 4, respiratory syncytial virus, human  
115 metapneumovirus, adenovirus, bocavirus, rhinovirus/enterovirus, *Mycoplasma pneumoniae*, *Legionella*  
116 *pneumophila* and *Bordetella pertussis*. Nucleic acid isolation for respiratory pathogens will be  
117 performed using the QIASymphony DSP Virus/Pathogen Mini Kit (Qiagen) and a QIASymphony SP  
118 instrument (Qiagen). The nucleic acid amplification and detection will take place using Anyplex™ II  
119 RV16 Detection (Seegene, Inc) and the CF96™ Real-Time PCR System (Bio-Rad Laboratories) from  
120 15 October 2014 to 31 December 2019. Between 9 January 2020 and 7 February 2020, a QIAstat-

121 DxTM (DiagCORE®) Respiratory Panel V2 (Qiagen) and the CF96™ Real-Time PCR System (Bio-  
122 Rad laboratories, Inc.) will be used for detection.

123

124 *Amendment on 2 October 2017:* We will prepare handouts with a brief outline of the research and  
125 distribute them to 49 day-care centers located in the city of Oulu, thereby contacting more than 4000  
126 families. If interested, a family can contact the research team directly by telephone. The team at Oulu  
127 University Hospital (MH, UK, NP, SS) will recruit eligible children for the trial and nurses working in  
128 the pediatric emergency room at Oulu University Hospital will obtain conjunctival and nasopharyngeal  
129 specimens from these children.

130

## 131 **2.6. Outcomes**

132 The primary outcome is time (in days) to a clinical cure, defined as resolution of all the conjunctival  
133 symptoms for 2 days without relapse. The secondary outcome is a relapse of conjunctivitis within 14  
134 days of randomization. We also will record any discomfort caused by administration of the eye drops  
135 and the effect of conjunctivitis on the quality of life (employing a visual analogue scale).

136

## 137 **3. STATISTICAL ANALYSIS PLAN**

### 138 **3.1. Sample size calculation**

139 During the registration process at ClinicalTrialsRegister.eu we evaluated the sample size required to  
140 obtain a 1-day difference in cure times between the groups. After the registration process but prior to  
141 initiation of the trial, we estimated that acute infective conjunctivitis in children resolves itself in 5 days  
142 (SD 2) without treatment,<sup>1</sup> so that a 1.5-day difference in cure time can be considered clinically  
143 significant. With a statistical power of 80% and a 2-sided  $\alpha$  error of 0.05, 29 children per group would  
144 be needed for the trial.

145

146 All the analyses will be performed on an intention-to-treat population, and only the primary and  
147 secondary outcomes that are prespecified in the protocol and statistical analysis plan will be compared.  
148 A one-way ANOVA test will be used to compare the duration of symptoms and Kaplan-Meier survival  
149 statistics to assess the variation in cure times. Relapse rates in the three groups will be compared using  
150 the Chi-square test. The data will be analyzed with IBM SPSS Statistics 25.

151

#### 152 **4. ORGANIZATION, FUNDING AND SCHEDULE**

153 The leaders of this independent investigator-initiated trial, Dr Minna Honkila, M.D., Ph.D., and Dr  
154 Terhi Tapiainen, M.D., Ph.D., are specialists in pediatric infectious diseases working at Oulu  
155 University Hospital and the University of Oulu. All the recruiting doctors are experienced clinicians,  
156 and the research team is experienced in conducting clinical trials among pediatric patients. Funding has  
157 been applied for from various foundations to cover the costs of medications involved and to enable full-  
158 time research for several months (Dr Minna Honkila). The work will begin in spring 2014.

159

160 *Amendment on 7 February 2020:* Due to the COVID-19 pandemic in spring 2020 and the national  
161 recommendations to restrict visits to healthcare facilities, we have decided to end the trial in March  
162 2020.

163

#### 164 *Amendment on 19 June 2021: Meta-analysis*

165 We will identify the literature in PubMed, ClinicalTrials.gov, Cochrane Library, Google Scholar,  
166 Scopus and ScienceDirect from inception to 31 December 2020 using the MeSH (Medical Subjects  
167 Headings) terms “conjunctivitis, bacterial” not “trachoma” for a literature search and include all  
168 randomized controlled trials that have compared topical antibiotics with a control group without

169 antibiotics for the treatment of acute conjunctivitis in children and adolescents aged 1 month to 18  
170 years. We will use PRISMA (PRISMA 2009 Checklist and PRISMA 2009 Flow Diagram) as a basis  
171 for reporting the meta-analysis and aim to collect, check, and reanalyze individual participation data for  
172 each eligible subject.

173

174 Our primary outcome is the time (days) to a clinical cure. Secondary outcomes are time (days) to a  
175 microbiological cure, treatment compliance, relapse of conjunctivitis within 4 weeks, complications  
176 and treatment of acute otitis and reports of adverse events.

177

178 *Amendment on 9 November 2021:* As it is not possible to obtain data on the original primary and  
179 secondary outcomes from the articles included in the meta-analysis, we modified the outcomes as  
180 follows: the primary outcome of the meta-analysis is the proportion of participants who has  
181 conjunctival symptoms on days 3 to 6, while secondary outcomes are the proportion of participants  
182 who has conjunctival symptoms on days 7 to 10 and the proportion without a microbiological cure on  
183 days 7 to 10.

184

185 Data from randomized controlled trials will be used to calculate odds ratios and 95% confidence  
186 intervals comparing antibiotics with a placebo and with no treatment. The  $\chi^2$  heterogeneity test and  $I^2$   
187 statistic will be used to investigate heterogeneity between trials. Potential publication bias will be  
188 analyzed using funnel plots and the Egger test. The analyses of outcomes will be performed using  
189 Comprehensive Meta Analysis software version 3.3.070 (Biostat, Inc).



190 **References**

- 191 1. Rose PW, Harnden A, Brueggemann AB, et al. Chloramphenicol treatment for acute  
192 infective conjunctivitis in children in primary care: a randomised double-blind placebo-  
193 controlled trial. *Lancet*. 2005;366(9479):37-43.
- 194 2. Gigliotti F, Williams WT, Hayden FG, et al. Etiology of acute conjunctivitis in children. *J*  
195 *Pediatr*. 1981;98(4):531-536.
- 196 3. Hautala N, Koskela M, Hautala T. Major age group-specific differences in conjunctival  
197 bacteria and evolution of antimicrobial resistance revealed by laboratory data surveillance.  
198 *Curr Eye Res*. 2008;33(11):907-911.
- 199 4. Gigliotti F, Hendley JO, Morgan J, Michaels R, Dickens M, Lohr J. Efficacy of topical  
200 antibiotic therapy in acute conjunctivitis in children. *J Pediatr*. 1984;104(4):623-626.
- 201 5. Rietveld RP, ter Riet G, Bindels PJ, Schellevis FG, van Weert HC. Do general practitioners  
202 adhere to the guideline on infectious conjunctivitis? Results of the Second Dutch National  
203 Survey of General Practice. *BMC Fam Pract*. 2007;8:54.
- 204 6. Sheikh A, Hurwitz B, van Schayck CP, McLean S, Nurmatov U. Antibiotics versus placebo  
205 for acute bacterial conjunctivitis. *Cochrane Database of Systematic Reviews*.  
206 2012;9:CD001211.

207

208

209

210

211

212

213

214

215 LIST OF AMENDMENTS

216 **Amendment on 2 October 2017:**

217 We will prepare handouts with a brief outline of the research and distribute them to 49 day-care  
218 centers located in the city of Oulu, thereby contacting more than 4000 families. If interested, a  
219 family can contact the research team directly by telephone. The team at Oulu University Hospital  
220 (MH, UK, NP, SS) will recruit eligible children for the trial and nurses working in the pediatric  
221 emergency room at Oulu University Hospital will obtain conjunctival and nasopharyngeal  
222 specimens from these children.

223

224 **Amendment on 7 February 2020:**

225 Due to the COVID-19 pandemic in spring 2020 and the national recommendations to restrict visits  
226 to healthcare facilities, we have decided to end the trial in March 2020. In addition, we have  
227 decided to perform a meta-analysis of the treatment of acute conjunctivitis in children.

228

229 **Amendment on 19 June 2021:**

230 We will identify the literature in PubMed, ClinicalTrials.gov, Cochrane Library, Google Scholar,  
231 Scopus and ScienceDirect from inception to 31 December 2020 using the MeSH (Medical Subjects  
232 Headings) terms “conjunctivitis, bacterial” not “trachoma” for a literature search and include all  
233 randomized controlled trials that have compared topical antibiotics with a control group without  
234 antibiotics for the treatment of acute conjunctivitis in children and adolescents aged 1 month to 18  
235 years. We will use PRISMA (PRISMA 2009 Checklist and PRISMA 2009 Flow Diagram) as a  
236 basis for reporting the meta-analysis and aim to collect, check, and reanalyze individual  
237 participation data for each eligible subject.

238

239 Our primary outcome is the time (days) to a clinical cure. Secondary outcomes are time (days) to a  
240 microbiological cure, treatment compliance, relapse of conjunctivitis within 4 weeks, complications  
241 of acute otitis and reports of adverse events.

242

243 Data from randomized controlled trials will be used to calculate odds ratios and 95% confidence  
244 intervals comparing antibiotics with a placebo and with no treatment. The  $\chi^2$  heterogeneity test and  
245  $I^2$  statistic will be used to investigate heterogeneity between trials. Potential publication bias will be  
246 analyzed using funnel plots and the Egger test. The analyses of outcomes will be performed using  
247 Comprehensive Meta Analysis software version 3.3.070 (Biostat, Inc).

248

249 **Amendment on 9 November 2021:**

250 As it is not possible to obtain data on the original primary and secondary outcomes from the articles  
251 included in the meta-analysis, we modified the outcomes as follows: the primary outcome of the  
252 meta-analysis is the proportion of participants who has conjunctival symptoms on days 3 to 6, while  
253 secondary outcomes are the proportion of participants who has conjunctival symptoms on days 7 to  
254 10 and the proportion without a microbiological cure on days 7 to 10.
