# Supplementary material for: Effect of Topical Antibiotics on Duration of Acute Infective Conjunctivitis in Children: A Randomized Clinical Trial and a Systematic Review and Meta-analysis
Source: PubMed Central journal article supplement (PMC9533187; doi:10.1001/jamanetworkopen.2022.34459), 2022-10-04
Supplement: jamanetwopen-e2234459-s003.pdf [file jamanetwopen-e2234459-s003.pdf]

## **Data Sharing Statement**

Honkila. Effect of Topical Antibiotics on Duration of Acute Infective Conjunctivitis in Children. *JAMA Netw Open*. Published October 04, 2022. doi:10.1001/jamanetworkopen.2022.34459

### **Data**

**Data available:** No
